# Supplementary material
Source: PubMed Central journal article supplement (PMC7047522)
Supplement: NIHMS1549825-supplement-Supplemental_Material.pdf [file NIHMS1549825-supplement-Supplemental_Material.pdf]

## Supplemental Materials

### **IgE contributes to atherosclerosis and obesity by affecting macrophage polarization, macrophage protein network, and foam cell formation**

Xian Zhang,<sup>1\*</sup> Jie Li,<sup>1,2\*</sup> Songyuan Luo,<sup>1</sup> Minjie Wang,<sup>1</sup> Qin Huang,<sup>1</sup> Zhiyong Deng,<sup>1</sup> Caroline de Febbo,<sup>1</sup> Aida Daoui,<sup>1</sup> Pei Xiong Liew,<sup>1</sup> Galina K. Sukhova,<sup>1</sup> Jari Metso,<sup>3</sup> Matti Jauhiainen,<sup>3</sup> Junli Guo,<sup>1,4</sup> Guo-Ping Shi<sup>1</sup>

- 1 Department of Medicine, Brigham and Women's Hospital and Harvard Medical School, Boston, Massachusetts 02115, USA
- 2 Department of Geriatrics, National Key Clinic Specialty, Guangzhou First People's Hospital, School of Medicine, South China University of Technology, Guangzhou, Guangzhou, China
- 3 Minerva Foundation Institute for Medical Research, National Institute for Health and Welfare, Genomics and Biobank Unit, Biomedicum 2U, Helsinki, Finland
- 4 Institute of Cardiovascular Research, the First Affiliated Hospital, Emergency and Trauma College; Key Laboratory of Emergency and Trauma of Ministry of Education, Hainan Medical University, Haikou, China

**Major Resource Table.** Animal, diet, antibody, and ELISA kit information.

**Animals**

| Species/Strain               | Vendor or source                                                                                                                     | Background strain | Catalog number | Sex             |
|------------------------------|--------------------------------------------------------------------------------------------------------------------------------------|-------------------|----------------|-----------------|
| <i>Apoe</i> <sup>-/-</sup>   | The Jackson Laboratory, Bar Harbor, ME                                                                                               | C57BL/6J          | 002052         | Male and female |
| <i>Ige</i> <sup>-/-</sup>    | Provided by Dr. Hans Oettgen, Boston Children's Hospital, Harvard Medical School, Boston, MA                                         | C57BL/6J          | N/A            | Male and female |
| <i>C3</i> <sup>-/-</sup>     | The Jackson Laboratory, Bar Harbor, ME                                                                                               | C57BL/6J          | 029661         | Male and female |
| <i>Fcer1a</i> <sup>-/-</sup> | Provided by Drs. Marie-Helene Jouvin and Jean-Pierre Kinet, Beth Israel Deaconess Medical Center, Harvard Medical School, Boston, MA | C57BL/6J          | N/A            | Male and female |
| <i>Nhe1</i> <sup>+/-</sup>   | The Jackson Laboratory, Bar Harbor, ME                                                                                               | C57BL/6J          | 003012         | Male and female |

**Cultured Cells**

| Name                            | Vendor or source | Sex (F, M or unknown) |
|---------------------------------|------------------|-----------------------|
| Bone-marrow-derived macrophages | C57BL/6J         | Male                  |

**Diets**

| Name                   | Catalog number | Company name and address              |
|------------------------|----------------|---------------------------------------|
| Normal laboratory diet | 5053           | Lab Supply, Fort Worth, TX            |
| Atherogenic diet       | D12108c        | Research Diets Inc. New Brunswick, NJ |

**Antibodies and ELISA kits**

| Immunostaining and Western blot antibody | Dilution | Concentration | Catalog number | Company name and address              |
|------------------------------------------|----------|---------------|----------------|---------------------------------------|
| MAC3                                     | 1:900    | 0.56 µg/ml    | 553322         | BD Biosciences, San Jose, CA          |
| CD31                                     | 1:500    | 1 µg/ml       | 553370         | BD Biosciences, San Jose, CA          |
| α-SMA                                    | 1:500    | unknown       | F3777          | Sigma-Aldrich, St. Louis, MO          |
| MHC-II                                   | 1:250    | 2 µg/ml       | 556999         | BD Biosciences, San Jose, CA          |
| CD4                                      | 1:90     | 5.56 mg/ml    | 553043         | BD Biosciences, San Jose, CA          |
| CD8                                      | 1:100    | 5 µg/ml       | 14-0081-85     | eBiosciences, San Diego, CA           |
| MYH11                                    | 1:2000   | 0.25 µg/ml    | 702544         | Thermo Fisher Scientific, Waltham, MA |

|                        |                 |                      |                       |                                        |
|------------------------|-----------------|----------------------|-----------------------|----------------------------------------|
| MCP1                   | 1:100           | 2 µg/ml              | AF-479-NA             | R&D Systems, Minneapolis, MN           |
| CD49b                  | 1:100           | 5 µg/ml              | 14-5971-85            | eBiosciences, San Diego, CA            |
| FcεR1                  | 1:50            | 20 µg/ml             | 06-727                | Millipore, Burlington, MA              |
| Complement C3          | 1:1000          | 0.08 µg/ml           | PA5-21349             | Thermo Fisher Scientific, Waltham, MA  |
| iNOS                   | 1:1000          | 4 µg/ml              | PA1-036               | Thermo Fisher Scientific, Waltham, MA  |
| Arg-1                  | 1:1000          | 0.5 µg/ml            | 678802                | BioLegend, San Diego, CA               |
| MAC2                   | 1:1000          | 1 µg/ml              | CL8942LE              | Cadarlane Laboratories, Burlington, NC |
| pERK                   | 1:1000          | unknown              | 4370                  | Cell Signaling Technology, Danvers, MA |
| ERK                    | 1:1000          | unknown              | 9107                  | Cell Signaling Technology, Danvers, MA |
| pp38                   | 1:1000          | unknown              | 4631                  | Cell Signaling Technology, Danvers, MA |
| p38                    | 1:1000          | unknown              | 9228                  | Cell Signaling Technology, Danvers, MA |
| GAPDH                  | 1:2000          | unknown              | 2118                  | Cell Signaling Technology, Danvers, MA |
| <b>FACS antibody</b>   | <b>Dilution</b> | <b>Concentration</b> | <b>Catalog number</b> | <b>Company name and address</b>        |
| CD45-PerCP-Cyanine5.5  | 1:100           | 0.2 µg/test          | 45-0451-82            | Invitrogen, Carlsbad, CA               |
| CD45-FITC              | 1:100           | 0.5 µg/test          | 11-0451-82            | eBiosciences, San Diego, CA            |
| Ly-6C-FITC             | 1:250           | 0.2 µg/test          | 53-5932-82            | Invitrogen, Carlsbad, CA               |
| F4/80-PerCP-Cyanine5.5 | 1:100           | 0.2 µg/test          | 123128                | BioLegend, San Diego, CA               |
| CD11b-APC              | 1:100           | 0.2 µg/test          | 17-0112-82            | eBiosciences, San Diego, CA            |
| FcεR1-FITC             | 1:250           | 0.2 µg/test          | 11-5898-82            | eBiosciences, San Diego, CA            |
| c-kit-APC              | 1:100           | 0.2 µg/test          | 17-1171-82            | eBiosciences, San Diego, CA            |
| CD200R3-PE             | 1:100           | 0.2 µg/test          | 142206                | BioLegend, San Diego, CA               |
| CD63-PE/Cy7            | 1:100           | 0.2 µg/test          | 143910                | BioLegend, San Diego, CA               |
| <b>ELISA kit</b>       | <b>Dilution</b> | <b>Concentration</b> | <b>Catalog number</b> | <b>Company name and address</b>        |
| Insulin                | N/A             | N/A                  | 90080                 | Crystal Chem, Elk Grove Village, IL    |
| IL-1β                  | N/A             | N/A                  | 88-7013-22            | Invitrogen, Carlsbad, CA               |
| TNF-α                  | N/A             | N/A                  | 88-7324-22            | Invitrogen, Carlsbad, CA               |
| IL-6                   | N/A             | N/A                  | 88-7064-88            | Invitrogen, Carlsbad, CA               |
| MCP-1                  | N/A             | N/A                  | 88-7391-88            | Invitrogen, Carlsbad, CA               |
| IFN-γ                  | N/A             | N/A                  | 88-7314-88            | Invitrogen, Carlsbad, CA               |
| Total triglyceride     | N/A             | N/A                  | T7532                 | Pointe Scientific, Canton, MI          |

|                   |     |     |         |                               |
|-------------------|-----|-----|---------|-------------------------------|
| Total cholesterol | N/A | N/A | C7510   | Pointe Scientific, Canton, MI |
| HDL cholesterol   | N/A | N/A | H7511   | Pointe Scientific, Canton, MI |
| Histamine         | N/A | N/A | RE59221 | IBL, Hamburg, Germany         |

## Supplemental Table

**Supplemental Table I.** Primers for quantitative real-time PCR.

| Gene          | Forward primer (5' to 3') | Reverse primer (5' to 3') |
|---------------|---------------------------|---------------------------|
| C3            | CCAGCTCCCCATTAGCTCTG      | GCACTTGCCTCTTTAGGAAGTC    |
| Lrp1          | CGGTGTGACGGTGAAAGAGA      | CCCCAGACAACACTGTGCTCAT    |
| TFR           | GGACGCCATGACTTTGGATG      | GCCATGACAGGCACTAGACC      |
| LPL           | CAAGACCTTCGTGGTGATCCA     | GTACAGGGCGGCCACAAG        |
| iNOS          | ACATCGACCCGTCCACAGTAT     | CAGAGGGGTAGGCTTGTCTC      |
| TNF- $\alpha$ | CAAAGGGAGAGTGGTCAGGT      | GGCAACAAGGTAGAGAGGC       |
| Arg-1         | CTCCAAGCCAAAGTCCTTAGAG    | AGGAGCTGTCATTAGGGACATC    |
| IL-10         | GAAGCATGGCCCAGAAATCA      | TGCTCCACTGCCTTGCTCTT      |
| MCP-1         | TTAAAAACCTGGATCGGAACCAA   | GCATTAGCTTCAGATTTACGGGT   |
| IL-6          | CCTTCCTACCCCAATTTCCAA     | AGATGAATTGGATGGTCTTGGTC   |
| CD68          | TGTCTGATCTTGCTAGGACCG     | GAGAGTAACGGCCTTTTTGTGA    |
| Mrc1          | TGATTACGAGCAGTGGAAGC      | GTTCACCGTAAGCCCAATTT      |
| GAPDH         | TGTCATACTTGGCAGGTTTCT     | CGTGTTCTACCCCAATGT        |

## Supplemental Figures

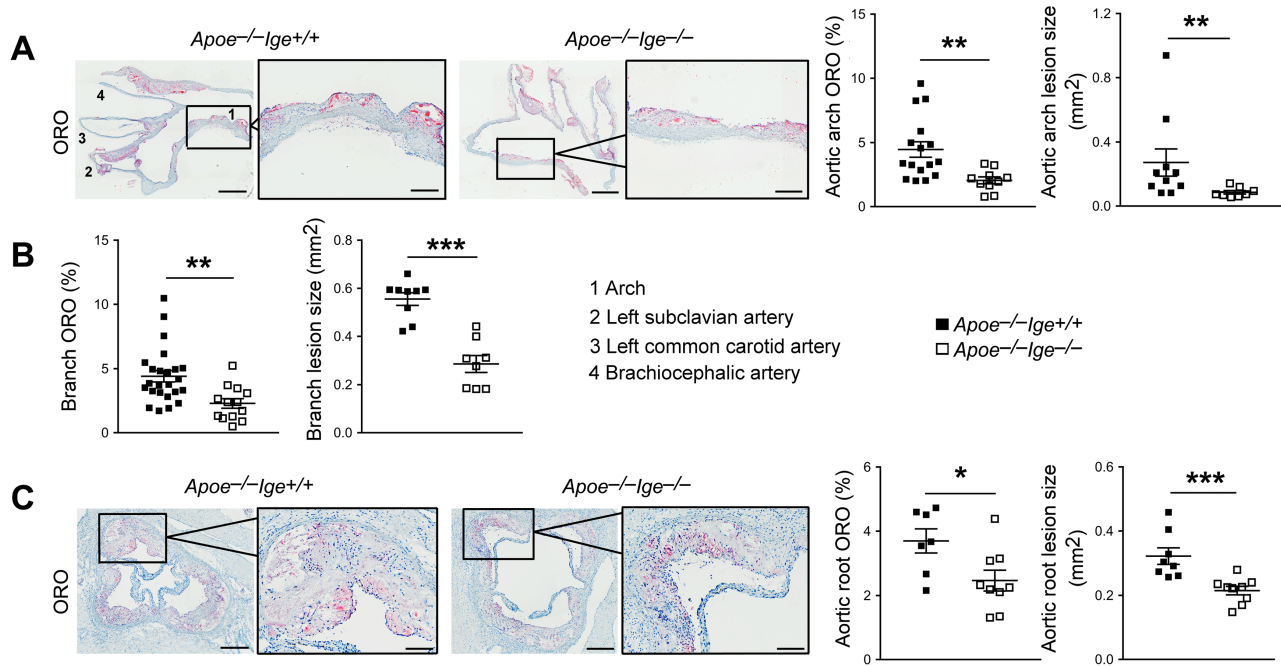

**Figure I.** IgE deficiency reduces atherosclerotic lesion size and lesion lipid deposition in *ApoE*<sup>-/-</sup> mice after 12 weeks of an atherogenic diet. ORO staining determined lipid deposition and intima areas in aortic arch (**A**, scale: 1 mm, inset: 300  $\mu$ m), three branches (brachiocephalic artery, left common carotid artery, and left subclavian artery) (**B**), and aortic root (**C**, scale: 1 mm, inset: 300  $\mu$ m). Representative images in panels **A** and **C** are shown to the left. n=8~24 mice per group. All data are mean $\pm$ SEM. \* $P$ <0.05, \*\* $P$ <0.01, \*\*\* $P$ <0.001.

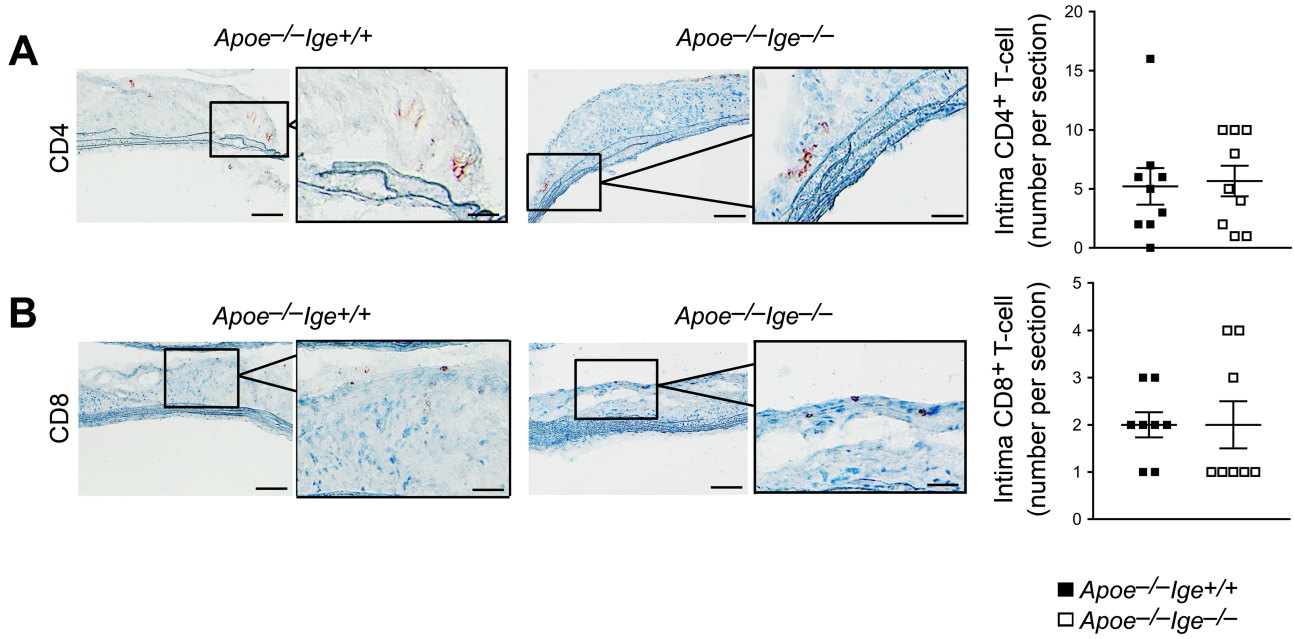

**Figure II.** IgE deficiency does not affect aortic arch intima CD4<sup>+</sup> T-cell and CD8<sup>+</sup> T-cell contents in *Apoe<sup>-/-</sup>* mice after 12 weeks of an atherogenic diet. Intima CD4<sup>+</sup> T cells (**A**) CD8<sup>+</sup> T cells (**B**) were presented as number per section. Scale: 200  $\mu$ m, inset scale: 70  $\mu$ m.

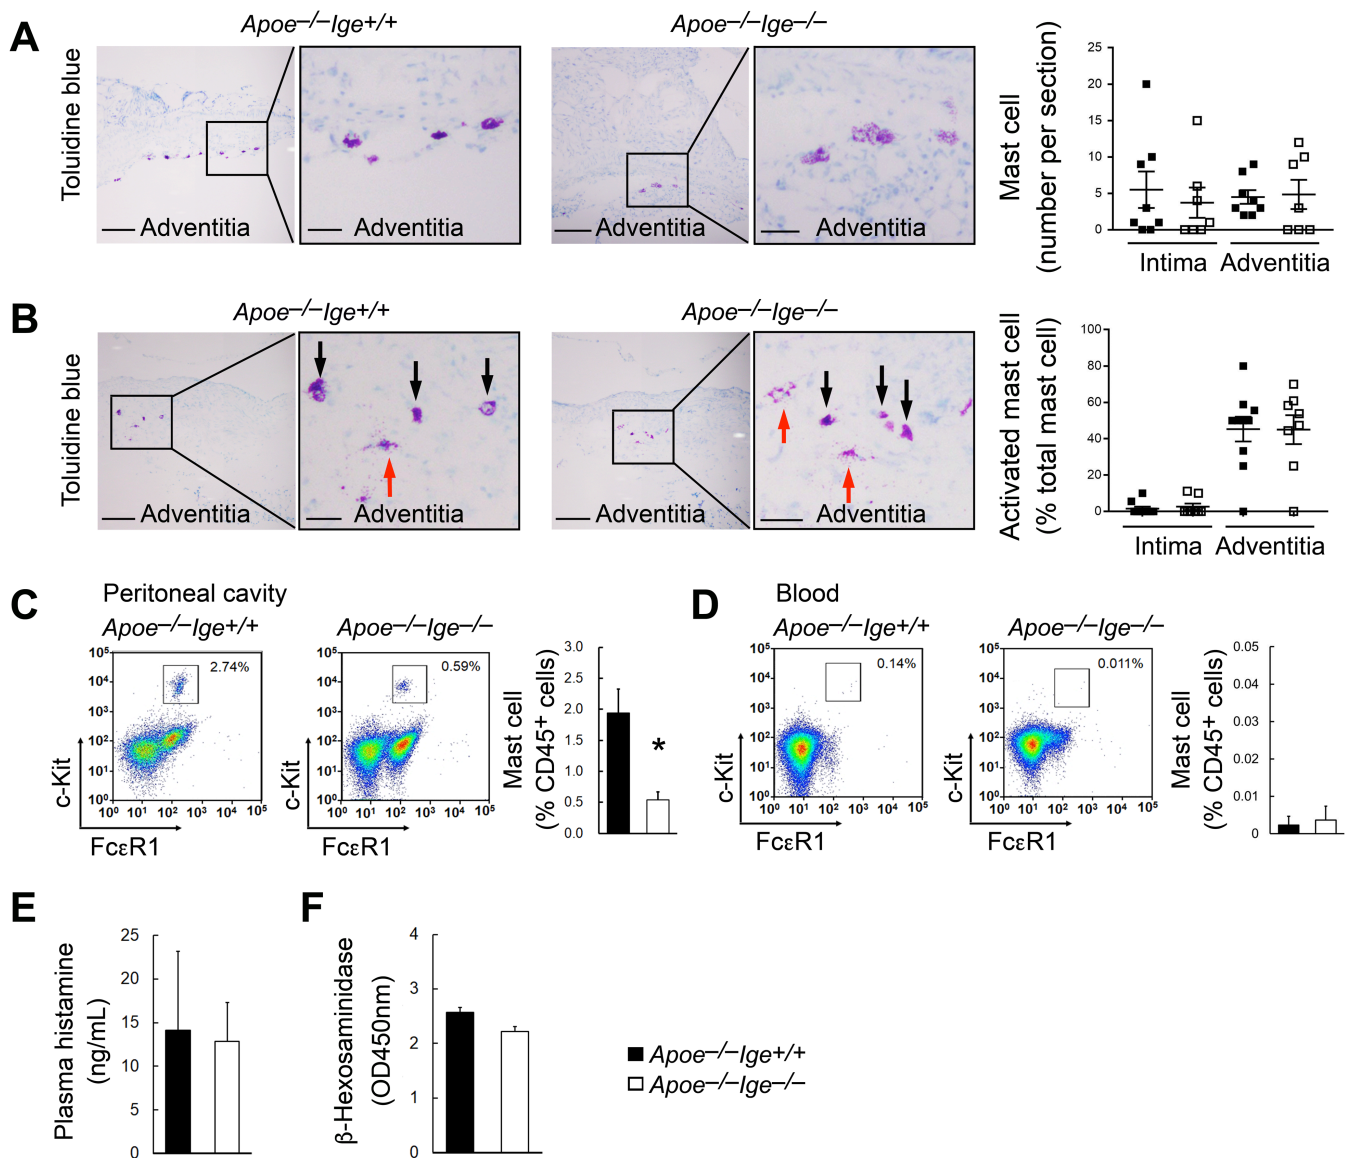

**Figure III.** IgE deficiency in *Apoe<sup>-/-</sup>Ige<sup>-/-</sup>* mice does not affect atherosclerotic lesion mast cell number and activation. **A.** Quantification of toluidine blue-positive mast cells in aortic arch intima and adventitia from *Apoe<sup>-/-</sup>Ige<sup>+/+</sup>* and *Apoe<sup>-/-</sup>Ige<sup>-/-</sup>* mice. **B.** Percentage of activated (degranulated, red arrows) mast cells over total mast cells (activated red arrows and non-activated black arrows) in both the aortic arch intima and adventitia from *Apoe<sup>-/-</sup>Ige<sup>+/+</sup>* and *Apoe<sup>-/-</sup>Ige<sup>-/-</sup>* mice. Scale: 200 μm, inset: 50 μm. **C-D.** FACS analysis of FcεR1<sup>+</sup>c-Kit<sup>+</sup> mast cells in the peritoneal cavity and FcεR1<sup>+</sup>c-Kit<sup>+</sup> mast cell progenitors in blood. **E-F.** Plasma histamine level and β-hexosaminidase activity. Representative images of panels **A-D** are shown to the left.

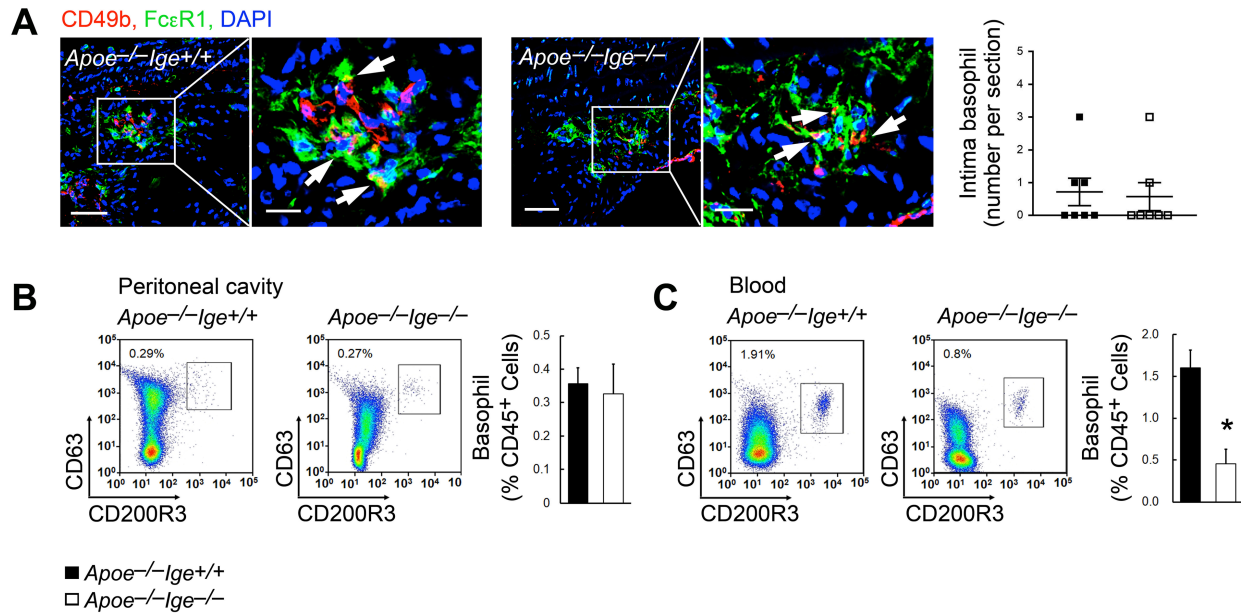

**Figure IV.** IgE deficiency in *Apoe<sup>-/-</sup>Ige<sup>-/-</sup>* mice does not affect atherosclerotic lesion intima basophils after mice consumed an atherogenic diet for 12 weeks. **A.** Immunofluorescent double staining detected FcεR1<sup>+</sup>CD49b<sup>+</sup> basophils in aortic arch intima. Scale: 100 μm, inset: 30 μm. **B-C.** FACS analysis of activated basophils (CD63<sup>+</sup>CD200R3<sup>+</sup>) in peritoneal cavity and blood. Representative images of panels **A-C** are shown to the left.

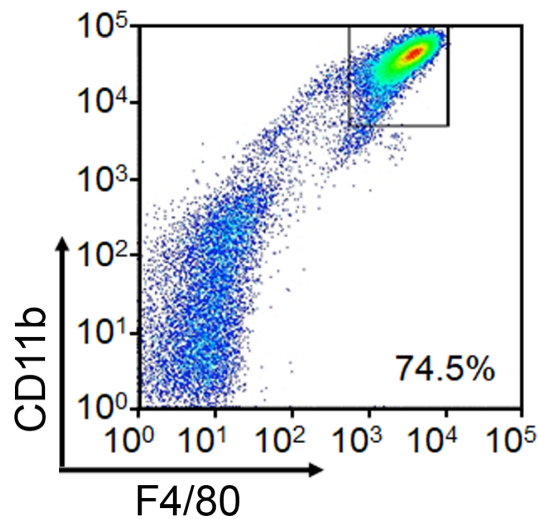

**Figure V.** FACS analysis assessed the purity of macrophages (F4/80<sup>+</sup>CD11b<sup>+</sup>) isolated from the peritoneum.



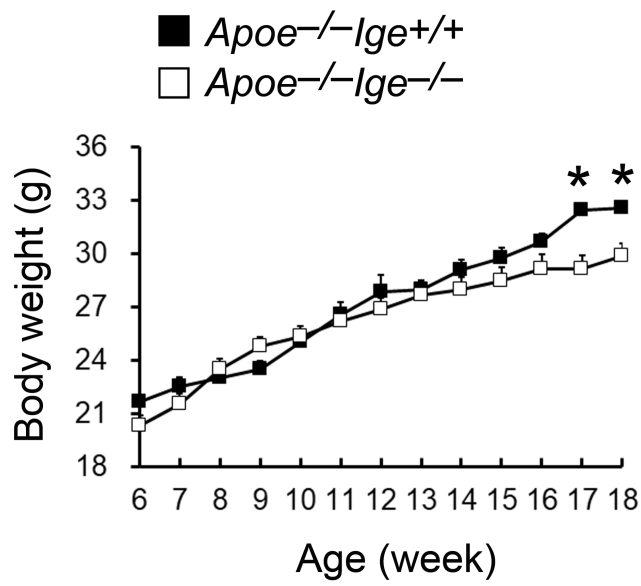

**Figure VI.** Body weight gain of *Apoe*<sup>-/-</sup>*Ige*<sup>-/-</sup> and *Apoe*<sup>-/-</sup>*Ige*<sup>+/+</sup> mice on a normal laboratory diet started with comparable body weight. n=14 mice per group. Data are mean±SEM. \**P*<0.05.
